# Supplementary material for: Spatial Heterogeneity, Trade-offs, and Bundle Identification of Ecosystem Services in Karst Watersheds: A Comprehensive Assessment of the Lijiang River Basin
Source: Research Square preprint supplement (doi:10.21203/rs.3.rs-8422525/v1), 2025-12-30
Supplement: Supplementary file 2 [file fd7208dd018d5506a67acd60.docx]

**Supplementary Material**

**2.3.2 Assessment Methods for the Ten Ecosystem Services**

**(1) Water Yield**

Water yield was estimated using the water yield module of the InVEST model, based on data including annual precipitation, annual actual evapotranspiration, bedrock depth, and land use (Dennedy-Frank et al., 2016, He et al., 2024). The method is grounded in the water balance principle, defining regional water yield as annual precipitation minus annual evapotranspiration (Fu, 1981b). The calculation employs the following equation:

Where: Y(x) is the annual water yield for pixel x. AET(x)is the annual actual evapotranspiration for that pixel. P(x) is the annual precipitation for that pixel.

The evapotranspiration component of the water balance is based on an expression of the Budyko curve(Fu, 1981a, Zhang, 2004):

Where: PET(x) is the potential evapotranspiration for pixel x. ω(x) is a non-physical parameter characterizing natural climate-soil properties.

Potential evapotranspiration PET(x) is defined as:

Where: KC(X)is the crop evapotranspiration coefficient for pixel x(Allen, 1998). ET0(x)is the reference crop evapotranspiration coefficient for that pixel.

AWC(x) is the plant-available water content for pixel x, representing the soil's capacity to supply water for vegetation growth (Donohue, 2012). It is calculated as the product of the Plant-Available Water Capacity (PAWC) and the minimum value between the constraining layer depth and the vegetation rooting depth. PAWC is calculated using the following formula **(Zhou, 2005)**. Z is an empirical constant termed the "seasonal factor". After repeated comparisons between modeling results and data from local water resources bulletins, it was calibrated to 1 for this study.

Where: sand%, silt%, and clay% represent the proportion of sand, silt, and clay in the soil, respectively. OM represents the soil organic matter content.

**(2) Carbon Sequestration**

Based on land use data and carbon pool values for each land type in the Lijiang River Basin obtained from relevant literature (Zhou et al., 2025), the total carbon storage was calculated using the carbon storage and sequestration module of the InVEST model. This module sums the aboveground, belowground, soil, and dead organic matter carbon pools for each land type. Total carbon storage is calculated as follows (Peng et al., 2019, An et al., 2024, Xie et al., 2025):

Where: Ctotal denotes total carbon storage, i.e., the sum of all carbon pools in the ecosystem. Cabove denotes aboveground biomass carbon, primarily the carbon in live plants above the surface (e.g., trunks, branches, leaves). Cbelow denotes belowground biomass carbon, primarily the carbon in plant roots. Csoil denotes the soil carbon pool, including carbon in soil organic matter and minerals. Cdead denotes litter/dead organic matter carbon, including surface litter and coarse woody debris.

**(3) Habitat Quality**

The habitat quality module of the InVEST model was used. Based on land use and road distribution data, and referencing literature to define threat factor tables(Huang, 2020) and sensitivity tables, this module assesses the extent of habitats/vegetation types and their degradation status according to the formula below, generating a habitat quality map.

Where: Qxj is the habitat quality for pixel x in land use type j, ranging from 0 to 1, with higher values indicating better quality. Hj is the habitat suitability for land use type j. K is the half-saturation constant.

**(4) Soil Conservation**

Soil erosion was calculated using the Revised Universal Soil Loss Equation (RUSLE) model(Jin, 2021) implemented via the sediment delivery ratio module of the InVEST model, based on data such as DEM and soil properties.

Where: Ac is the annual average soil retention per unit area. Ap and Ar are the potential and actual soil erosion amounts, respectively. R is the rainfall erosivity factor. K is the soil erodibility factor. LS is the topographic factor. P is the support practice factor. C is the cover-management factor. Values for C and P were adopted from the literature (Xu, 2006). The rainfall erosivity factor was calculated using the following formula (Zhang, 2003):

Where: Pj is the mean annual precipitation.

The soil erodibility factor was calculated in ArcGIS using the Raster Calculator, following the method described in the reference (Zhou, 2020).

**(5) Water Purification (Nitrogen, Phosphorus)**

The nutrient delivery ratio (NDR) module of the InVEST model was used to assess the retention capacity for nitrogen and phosphorus. Based on land use, DEM, and other data, and referencing literature to set parameters for the biophysical table, the threshold flow accumulation value, and the Boresellik parameter(Li, 2022), the model simulates the nutrient transport process from sources to water bodies. It considers flow paths generated from the DEM and the nutrient retention efficiency of land uses. In this study, the purification service was represented by the difference between the nutrient load and the nutrient export.

**(6) Water Conservation**

Water conservation was estimated by modifying the water yield based on the surface runoff coefficient (Shen, 2024). The difference between water yield and surface runoff was used as the water conservation quantity (Zhang, 2023), providing a more accurate reflection of the ecosystem's capacity to regulate water resources. The main calculation formulas are:

Where: Wx is the annual water conservation. Yx is the annual water yield. Rx is the annual surface runoff. Px is the annual precipitation. ETx is the annual evapotranspiration.

**(7) Food Production**

Food production service, primarily supplied by cropland, forestland, and grassland, provides humans with agricultural products, cash crops, and livestock products. Given the positive correlation between food yield and NDVI (Kuri, 2014), this study integrated data on agricultural, livestock, and aquatic products from statistical yearbooks. The production capacity of cropland, forestland, and grassland was spatially allocated using a weighting scheme based on the NDVI index. All products were uniformly converted into standard grain equivalent yield (Yan, 2024), enabling the spatial representation of supply service (Qiao, 2022). The calculation formula is as follows(Li et al., 2024, Fan et al., 2024):

Where: Gi is the grain, meat, milk, or aquatic product in grid i. FSsum is the total supply of each product in the study area. NDVIi is the NDVI value in grid i. NDVIsum is the sum of NDVI for cropland, forestland, and grassland in the study area. A0 is the area of one grid (1 km²).Asum is the total water area in the study area.

**(8) Biodiversity Conservation**

DEM, annual precipitation, mean annual temperature, and NPP data were normalized using the range method. The biodiversity maintenance service capacity index was then calculated in ArcGIS using the Raster Calculator according to the following formula (Sun, 2022, Tu, 2024):

Where: Sbio is the biodiversity maintenance service capacity index; NPPmean is the mean annual net primary productivity; Fpre is the mean annual precipitation factor; Ftem is the mean annual temperature factor; Falt is the altitude factor.

**(9) Recreation Service**

This study simulated recreation service using the Recreation Opportunity Spectrum (ROS) mode(Boyd, 1996, Huang et al., 2023). Recreation service represents the non-material benefits humans obtain from nature that contribute to physical and mental well-being (Willis, 2015). Therefore, it is influenced not only by the ecosystem's intrinsic attributes but also by factors such as accessibility and geographical location. An evaluation system was constructed from four dimensions: naturalness, accessibility, scenic spot density, and population density(Maes et al., 2013). The weights of indicators were determined using a combination of the entropy weight method and the analytic hierarchy process (AHP). Recreation service capacity was spatially quantified through raster overlay.

**2.3.3** **Analysis of Ecosystem Service Interrelationships**

**(1) Spatial Hotspot and Coldspot Identification**

To reveal the spatial clustering patterns of each ecosystem service, this study employed spatial autocorrelation analysis. First, service values were aggregated based on 1-km² grid units. Global spatial autocorrelation was assessed using the Global Moran's I index. This statistic identifies whether services exhibit clustered, dispersed, or random distribution patterns at the regional scale by comparing the similarity of attribute values among neighboring spatial units. Its calculation formula is as follows:

Where: N is the total number of spatial units; xi and xj are the observed values at spatial units I and j; x̄ is the mean of all observed values; Wij is an element of the spatial weight matrix quantifying the spatial relationship between units i and j; W is the sum of all spatial weights Wij. An I>0 indicates positive spatial autocorrelation (i.e., clustering of high or low values); I<0 indicates negative spatial autocorrelation (i.e., a checkerboard pattern of high and low values); I=0 suggests no significant spatial autocorrelation.

To further identify local spatial cluster types, hotspot analysis was conducted using the Getis-Ord Gi* statistic, calculated as:

Where: ，

Statistically significant hotspots (clusters of high values) and coldspots (clusters of low values) were identified based on the z-score and corresponding p-value of each unit.

**(2) Trade-offs and Synergies**

To clarify the interaction mechanisms among ecosystem services, Spearman's rank correlation coefficient was used in RStudio (R 4.5.1) to analyze pairwise relationships between services. This coefficient, which does not assume a specific data distribution and is robust to outliers (Zar, 2005), reflects the direction and strength of the relationship between service pairs (Sylla et al., 2020, Wu et al., 2022) and is thus widely used in ES trade-off and synergy studies (Li and Luo, 2023, Wang et al., 2021, Zeng et al., 2022, Zhang et al., 2023, Simeon and Wana, 2025). A positive result indicates a synergistic relationship (mutual enhancement), while a negative result indicates a trade-off relationship (one increases at the expense of the other) (Wu et al., 2022). A coefficient near zero suggests the two services are independent.

Based on Cohen's guidelines(Cohen, 1988) and their widespread application in environmental research(Bennett, 2009, Qiu, 2013), the absolute value of the correlation coefficient was interpreted as follows to indicate strength: negligible (0.00–0.19), weak (0.20–0.39), moderate (0.40–0.59), strong (0.60–0.79), and very strong (0.80–1.00).

To further reveal the spatial heterogeneity of trade-off/synergy relationships, bivariate local spatial autocorrelation analysis in Geoda software was employed to identify local cluster types for each ES pair. 'High-High' and 'Low-Low' clusters represent spatial synergy, whereas 'High-Low' and 'Low-High' clusters reflect spatial trade-offs. This analysis, conducted on the Geoda platform, effectively revealed the local patterns and spatial dependence of interactions between services.


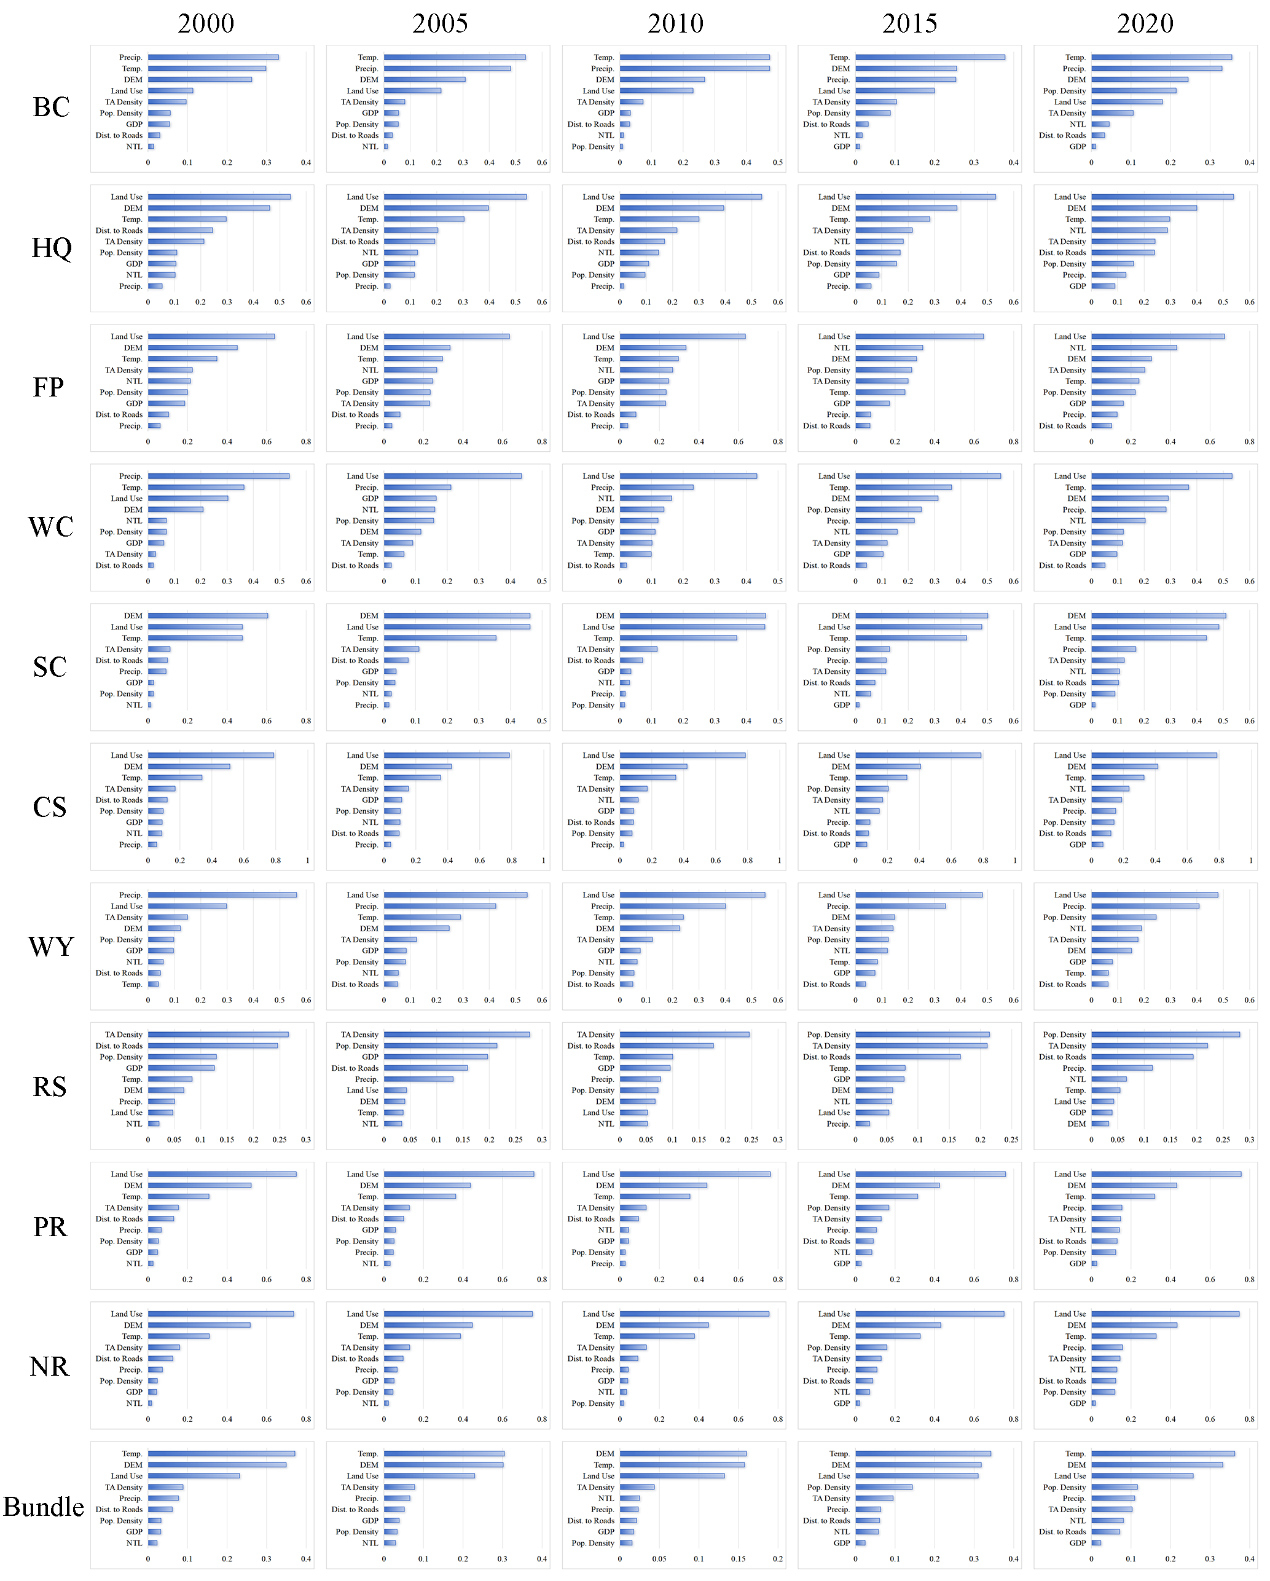
Fig.S1. Driving factors of each ecosystem service and ecosystem service bundles

**References**

Allen, R. G. P., L.S. Raes, D. Smith, M. 1998. Crop evapotranspiration. Guidelines for computing crop water requirements.

An, Q. M., Yuan, X. F., Zhang, X. R., Yang, Y., Chen, J. H. & An, J. J. 2024. Spatio-temporal interaction and constraint effects between ecosystem services and human activity intensity in Shaanxi Province,China. Ecological Indicators. 160. <https://doi.org/10.1016/j.ecolind.2024.111937>

Bennett, E. M. P., G. D. Gordon, L. J. 2009. Understanding relationships among multiple ecosystem services. Ecology Letters. 12, 1394-1404.

Boyd, S. W. B., R.W. 1996. Managing ecotourism: an opportunity spectrum approach. In: MANAGEMENT, T. (ed.).

Cohen, J. 1988. Statistical power analysis for the behavioral sciences. Lawrence Erlbaum Associates, City.

Dennedy-Frank, P. J., Muenich, R. L., Chaubey, I. & Ziv, G. 2016. Comparing two tools for ecosystem service assessments regarding water resources decisions. Journal of Environmental Management. 177, 331-340. <https://doi.org/10.1016/j.jenvman.2016.03.012>

Donohue, R. J. R., M. L. McVicar, T. R. 2012. Roots, storms and soil pores: Incorporating key ecohydrological processes into Budyko's hydrological model. Journal of Hydrology. 436-437, 35-50.

Fan, S. X., Yan, M., Yu, L. F., Chen, B. W. & Zhang, L. 2024. Integrating ecosystem service supply-demand and ecological risk assessment for urban planning: A case study in Beijing, China. Ecological Indicators. 161. <https://doi.org/10.1016/j.ecolind.2024.111950>

Fu, B. P. 1981a. On the calculation of the evaporation from land surface. Scientia Atmospherica Sinica. 5, 23-31.

Fu, B. P. 1981b. On the calculation of the evaporation from land surface (in Chinese). Sci. Atmos. Sin. 5, 23– 31.

He, L. J., Xie, Z. Y., Wu, H. Q., Liu, Z., Zheng, B. F. & Wan, W. 2024. Exploring the interrelations and driving factors among typical ecosystem services in the Yangtze river economic Belt, China. Journal of Environmental Management. 351. <https://doi.org/10.1016/j.jenvman.2023.119794>

Huang, F. X., Zuo, L. Y., Gao, J. B., Jiang, Y., Du, F. J. & Zhang, Y. B. 2023. Exploring the driving factors of trade-offs and synergies among ecological functional zones based on ecosystem service bundles. Ecological Indicators. 146. <https://doi.org/10.1016/j.ecolind.2022.109827>

Huang, G. J. 2020. Evaluation of Ecosystem Services in Karst Basin Based onInVEST Model [PhD Dissertation]. Guizhou Normal University, City, Country.

Jin, F. Y., W. Fu, J. Li, Z. 2021. Effects of vegetation and climate on the changes of soil erosion in the Loess Plateau of China. Science of The Total Environment. 773, 145514. <https://doi.org/10.1016/j.scitotenv.2021.145514>

Kuri, F. M., A. Murwira, K.S. Masocha, M. 2014. Predicting maize yield in Zimbabwe using dry dekads derived from remotely sensed vegetation condition index. International Journal of Applied Earth Observation and Geoinformation. 33, 39-46. <https://doi.org/10.1016/j.jag.2014.04.021>

Li, Q., Li, D., Wang, J. F., Wang, S., Wang, R. D., Fu, G., Yuan, Y. X. & Zheng, Z. H. 2024. Spatial heterogeneity of ecosystem service bundles and the driving factors in the Beijing-Tianjin-Hebei region. Journal of Cleaner Production. 479. <https://doi.org/10.1016/j.jclepro.2024.144006>

Li, W., Zhao, Z. L., Lyu, S. S., Zhao, W. Q. 2022. Attenuation of Pollutants in Beipanjiang River Basin Calculated Using the InVEST Model. Journal of Irrigation and Drainage. 41, 105-113. <https://doi.org/10.13522/j.cnki.ggps.2021471>

Li, Y. & Luo, H. F. 2023. Trade-off/synergistic changes in ecosystem services and geographical detection of its driving factors in typical karst areas in southern China. Ecological Indicators. 154. <https://doi.org/10.1016/j.ecolind.2023.110811>

Maes, J., Hauck, J., Paracchini, M. L., Ratamäki, O., Hutchins, M., Termansen, M., Furman, E., Pérez-Soba, M., Braat, L. & Bidoglio, G. 2013. Mainstreaming ecosystem services into EU policy. Current Opinion in Environmental Sustainability. 5, 128-134. <https://doi.org/10.1016/j.cosust.2013.01.002>

Peng, J., Hu, X. X., Wang, X. Y., Meersmans, J., Liu, Y. X. & Qiu, S. J. 2019. Simulating the impact of Grain-for-Green Programme on ecosystem services trade-offs in Northwestern Yunnan, China. Ecosystem Services. 39. <https://doi.org/10.1016/j.ecoser.2019.100998>

Qiao, X. S., Y. Guo, J. Yang, Y. et al. 2022. Impacts of urban expansion on ecosystem services in different size cities of Zhengzhou metropolitan area. Geographical Research. 41, 1913-1931.

Qiu, J. T., M. G. 2013. Spatial interactions among ecosystem services in an urbanizing agricultural watershed. Proceedings of the National Academy of Sciences of the United States of America. 110, 12149-12154.

Shen, M. S., Liu, Y. Y., Zheng, H., Chen, J. 2024. Evaluation of Water Source Conservation Service Value and Its Spatial Transfer in Yangtze River Basin. Journal of Changjiang River Scientific Research Institute. 41, 14-22+36.

Simeon, M. & Wana, D. 2025. Synergies and trade-offs among key ecosystem services in Maze National Park and its environs, southwestern Ethiopia. Global Ecology and Conservation. 57. <https://doi.org/10.1016/j.gecco.2024.e03398>

Sun, L. H., Liu, H., Wang, D., Hao, H. G. 2022. Research on Ecological Security Pattern Construction Based on the Evaluationof Ecosystem Services and Eco-Environmental Sensitivity. Research of Environmental Sciences. 35, 2508-2517. <https://doi.org/10.13198/j.issn.1001-6929.2022.10.11>

Sylla, M., Hagemann, N. & Szewranski, S. 2020. Mapping trade-offs and synergies among peri-urban ecosystem services to address spatial policy. Environmental Science & Policy. 112, 79-90. <https://doi.org/10.1016/j.envsci.2020.06.002>

Tu, C., Luo, W. Q., Chen, Y. Q., Wu, Z. Y., Hu, Z. X., Liu, S. H., Ma, Q., Qin, L. T. 2024. Zoning management of karst landscape resources in Guilin based on ecosystem sensitivity and service function. Geology in China. 51, 1839-1854.

Wang, L. N., Yu, E. Y., Li, S., Fu, X. & Wu, G. 2021. Analysis of Ecosystem Service Trade-Offs and Synergies in Ulansuhai Basin. Sustainability. 13. <https://doi.org/10.3390/su13179839>

Willis, C. 2015. The contribution of cultural ecosystem services to understanding the tourism-nature-wellbeing nexus. Journal of Outdoor Recreation and Tourism-Research Planning and Management.

Wu, L. L., Sun, C. G. & Fan, F. L. 2022. Multi-criteria framework for identifying the trade-offs and synergies relationship of ecosystem services based on ecosystem services bundles. Ecological Indicators. 144. <https://doi.org/10.1016/j.ecolind.2022.109453>

Xie, B. G., You, S. M. & Zhou, K. C. 2025. Spatiotemporal evolution and multiscenario simulation of cultivated land ecosystem services in the Dongting Lake Plain. Scientific Reports. 15. <https://doi.org/10.1038/s41598-025-95960-5>

Xu, Y. Q., Shao, X. M. 2006. Estimation of soil erosion supported by GIS and RUSLE: A case study of Maotiaohe Watershed, Guizhou Province. Journal of Beijing Forestry University. 67-71. <https://doi.org/Cnki:Sun:Bjly.0.2006-04-013>

Yan, W. P. 2024. Spatial and Temporal Characteristics of Ecosystem Service Supply and Demand in the Upper Reaches of the Min River and Research on Ecologica Compensation [PhD Dissertation]. Southwest University Of Science And Technology, City, Country.

Zar, J. H. 2005. Spearman Rank Correlation. Encyclopedia of Biostatistics. Wiley.

Zeng, J. W., Xu, J. P., Li, W. Y., Dai, X. A., Zhou, J. Y., Shan, Y. F., Zhang, J. J., Li, W. L., Lu, H., Ye, Y. K., Xu, L., Liang, S. N. & Wang, Y. L. 2022. Evaluating Trade-Off and Synergies of Ecosystem Services Values of a Representative Resources-Based Urban Ecosystem: A Coupled Modeling Framework Applied to Panzhihua City, China. Remote Sensing. 14. <https://doi.org/10.3390/rs14205282>

Zhang, C. S., Fan, N., Liu, C. L., Xie, G. D. 2023. Spatio-temporal pattern and evolution of ecosystem water conservation in China from 1990 to 2018. Acta Ecologica Sinica. 43, 5536-5545.

Zhang, J. X., Wang, Y. F., Sun, J., Zhang, Y. Z., Wang, D., Chen, J. H. & Liang, E. R. Y. 2023. Trade-offs and synergies of ecosystem services and their threshold effects in the largest tableland of the Loess Plateau. Global Ecology and Conservation. 48. <https://doi.org/10.1016/j.gecco.2023.e02706>

Zhang, L. a. H., K. and Dawes, W. R. and Chiew, F. H. S. and Western, A. W. and Briggs, P. R. 2004. A rational function approach for estimating mean annual evapotranspiration. Water Resources Research. 40.

Zhang, W. B., Fu, J. S. 2003. Rainfall erosivity estimation under different rainfall amount. Resources Science. 35-41. <https://doi.org/Cnki:Sun:Zrzy.0.2003-01-005>

Zhou, P. 2020. Investigation on the Optimization of Territorial Space Pattern and Function Enhancement Path in Taihang Mountain Region [PhD Dissertation]. University of Chinese Academy of Sciences, City, Country.

Zhou, W. Z., Liu, G. H., Pan, J. J. 2005. Distribution of available soil water capacity in China. Journal of Geographical Sciences. 5-14. <https://doi.org/Cnki:Sun:Zgde.0.2005-01-000>

Zhou, X. R., Wang, J. Y., Tang, L., He, W. & Li, H. 2025. Impact of Land Use Change on Carbon Storage Dynamics in the Lijiang River Basin, China: A Complex Network Model Approach. Land. 14. <https://doi.org/10.3390/land14051042>
